# Supplementary material for: Printing conformal and flexible copper networks for multimodal pressure and flow sensing
Source: Royal Society of Chemistry journal article supplement (doi:10.1039/d3nr03481j), 2023-01-01
Supplement: d3nr03481j1.pdf [file d3nr03481j1.pdf]

## Supporting Information

### **Printing Conformal and Flexible Copper Networks for Multimodal Pressure and Flow Sensing**

*Saurabh Khuje,<sup>a</sup> Abdullah Islam,<sup>a</sup> Jian Yu,<sup>b,\*</sup> Shenqiang Ren<sup>a,\*</sup>*

<sup>a</sup>Department of Materials Science and Engineering, University of Maryland, College Park, Maryland, 20742, United States

<sup>b</sup>DEVCOM Army Research Laboratory, Aberdeen Proving Ground, Maryland 21005, United States

\*Email: jian.h.yu.civ@army.mil; sren@umd.edu.

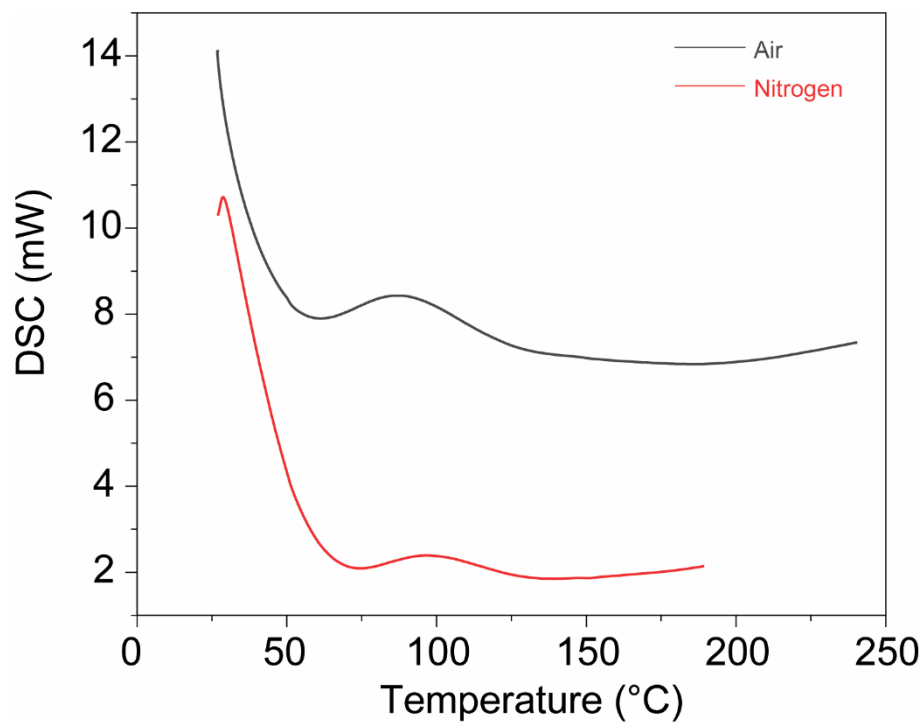

**Figure S1.** DSC curves for polycarbonate evaluated in air and in nitrogen environments.

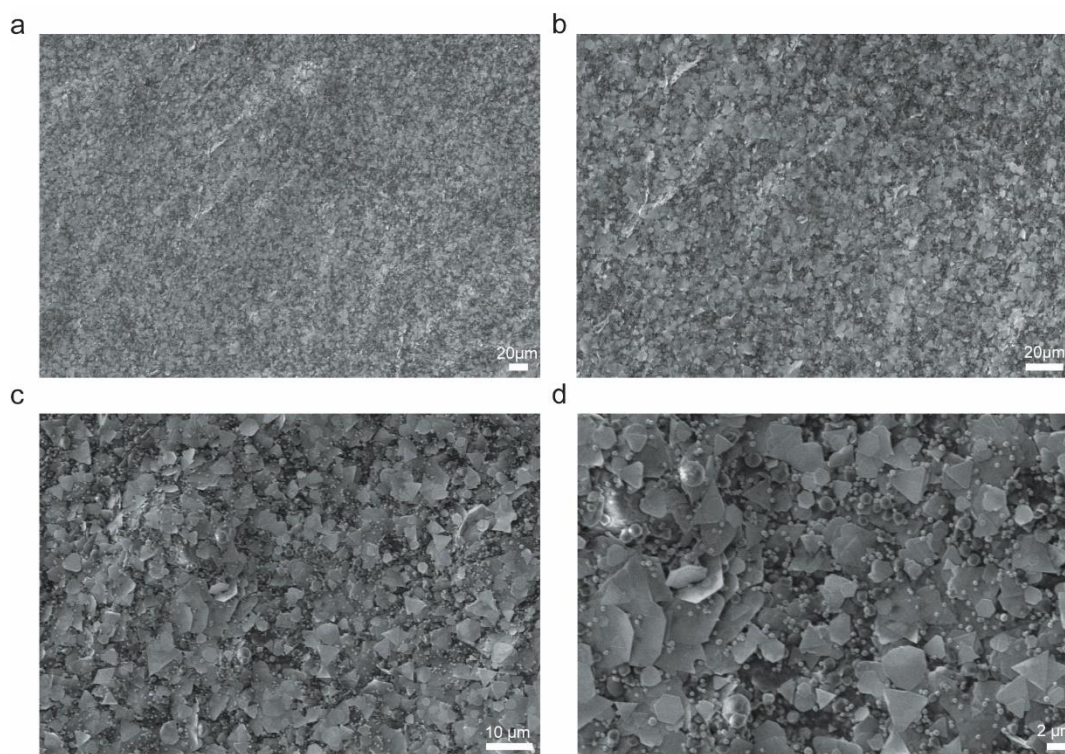

**Figure S2.** SEM images of unsintered copper nanoplates. (a) 500× magnification. (b) 1000× magnification. (c) 2500× magnification. (d) 5000× magnification.

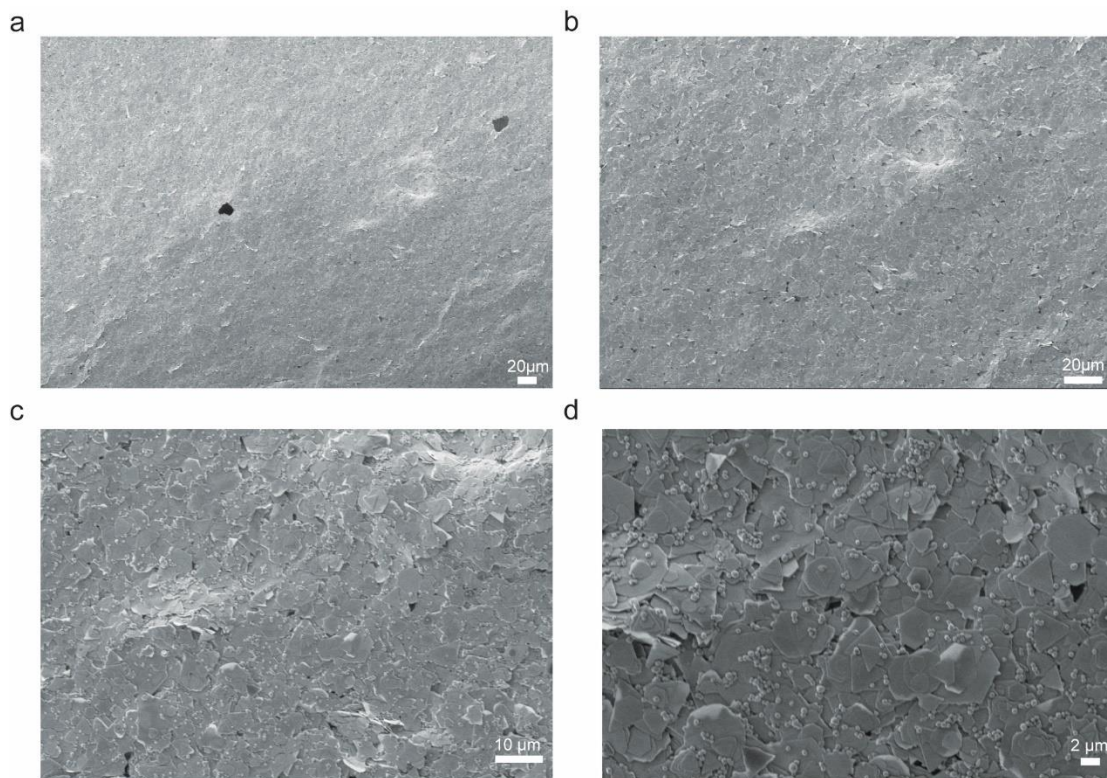

**Figure S3.** SEM images of unsintered copper nanoplates hot-pressed at 150°C. (a) 500× magnification. (b) 1000× magnification. (c) 2500× magnification. (d) 5000× magnification.

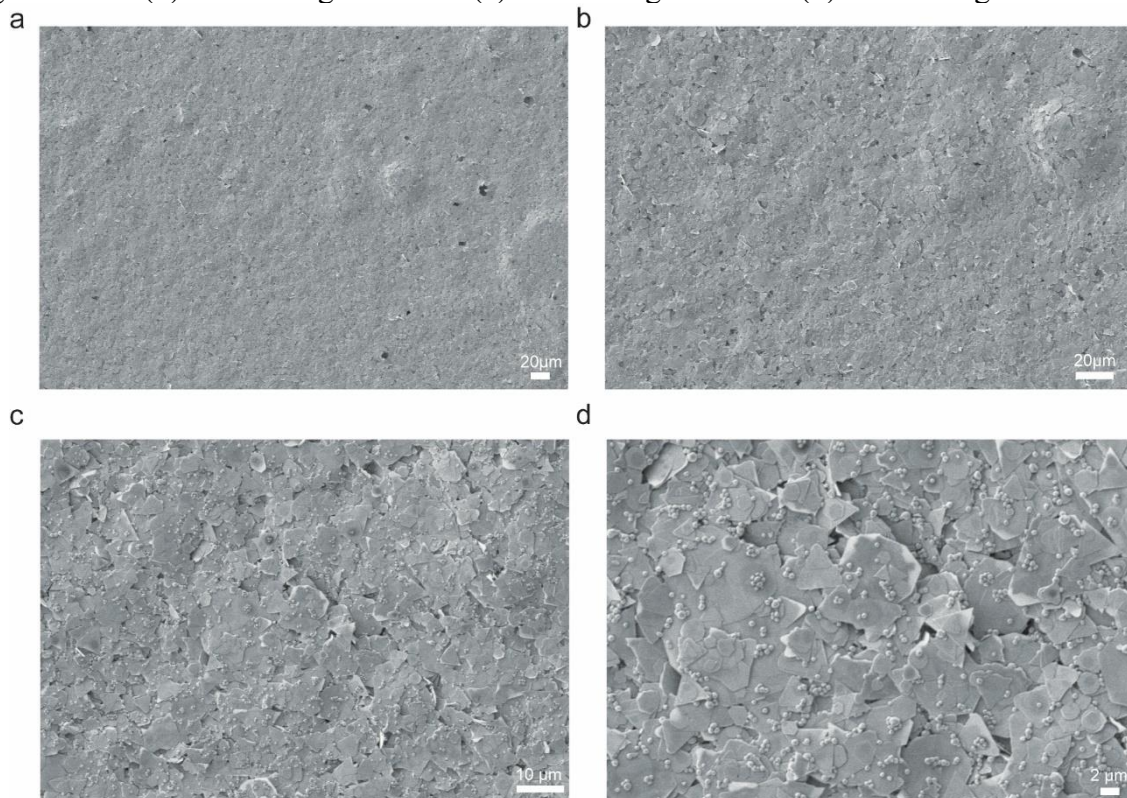



**Figure S4.** SEM images of unsintered copper nanoplates hot-pressed at 180°C. (a) 500× magnification. (b) 1000× magnification. (c) 2500× magnification. (d) 5000× magnification.

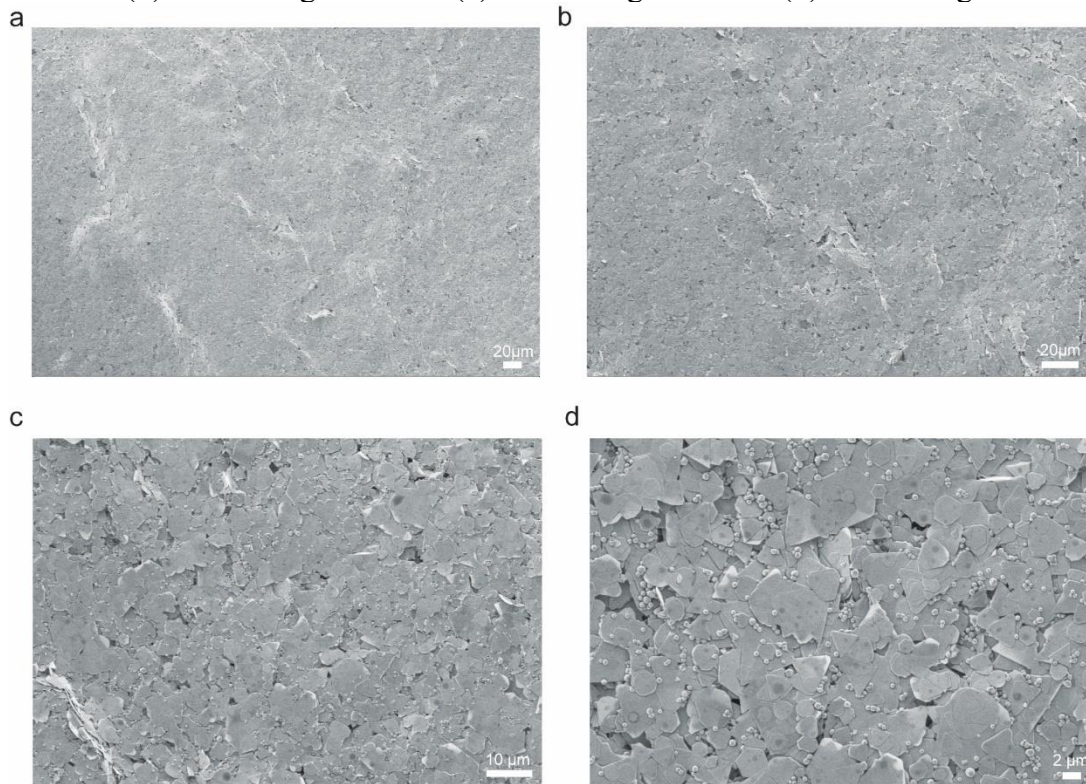

**Figure S5.** SEM images of unsintered copper nanoplates hot-pressed at 200°C. (a) 500× magnification. (b) 1000× magnification. (c) 2500× magnification. (d) 5000× magnification.

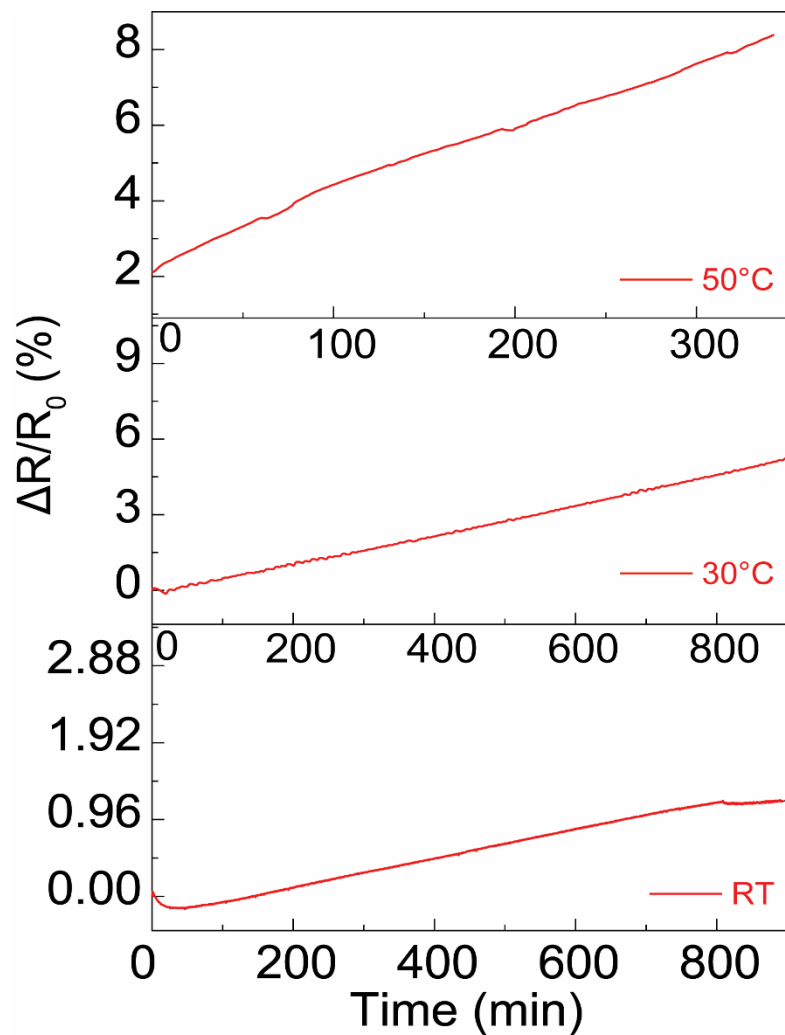

**Figure S6.** Reliability curves for the temperature sensor at room temperature, 30°C and 50°C.

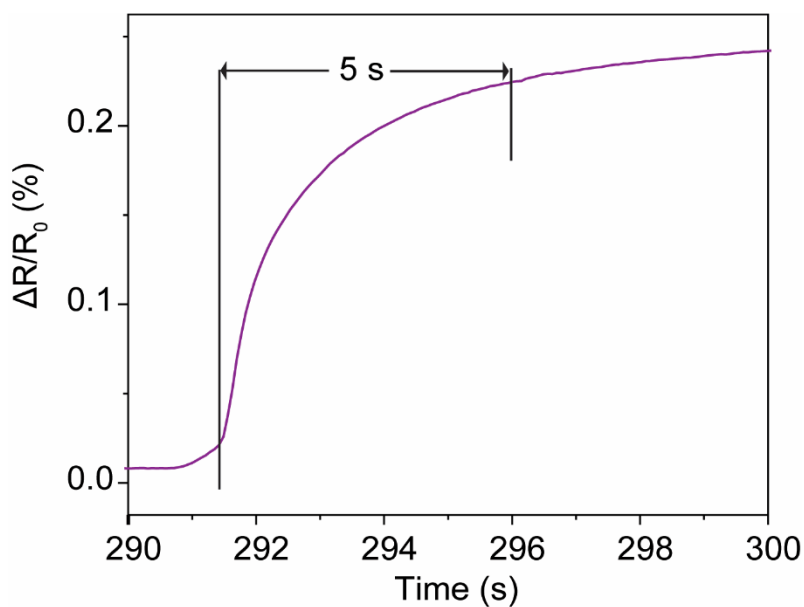

**Figure S7.** Response time for sensor under a pressure of 557.2 Pa

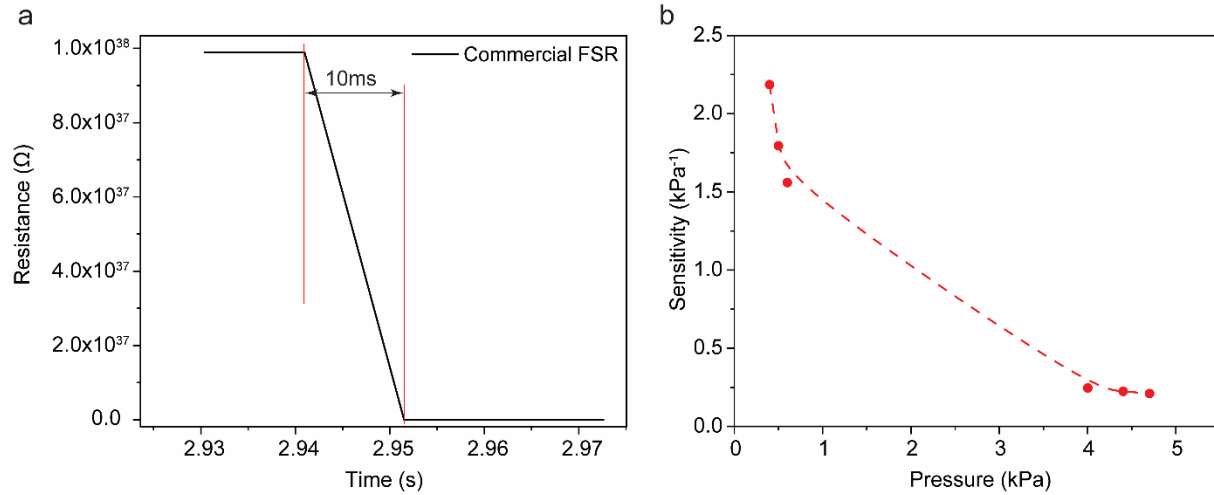

**Figure S8.** (a) Plot depicting the response time of a commercial Force Sensitive Resistor (FSR). (b) Sensitivity vs Pressure plot for the commercial FSR sensor.

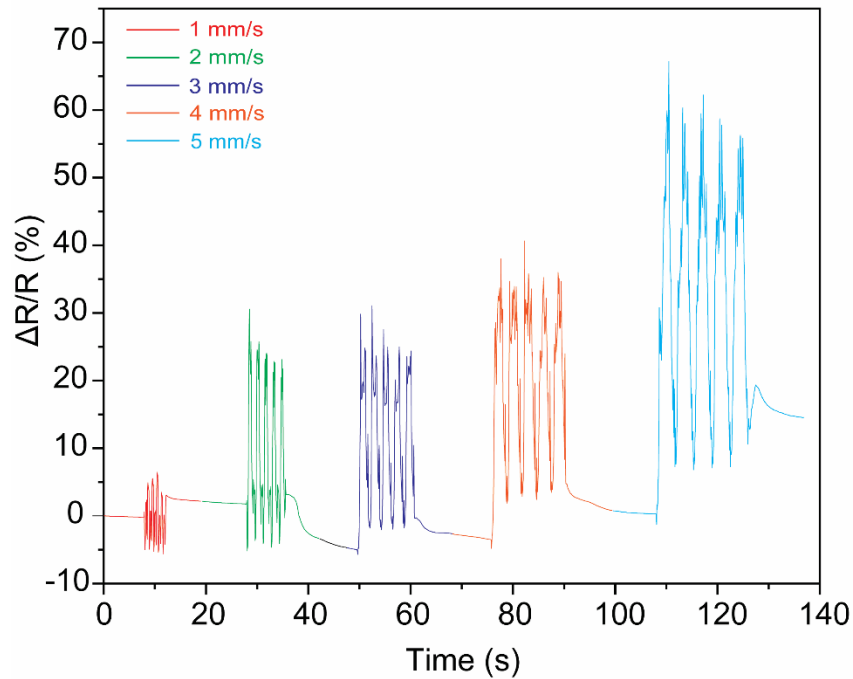

**Figure S9.** Sensor utilized for strain sensing at different strain rates applied via a mechanical test setup.

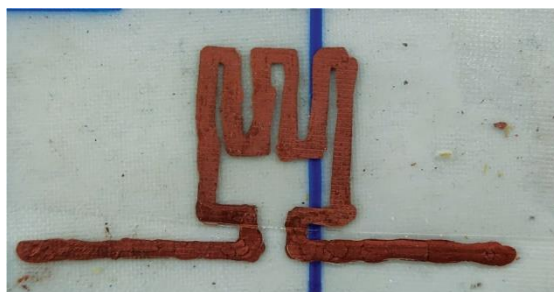

**Figure S10.** Optical image of the modified sensor with the dipole antenna.

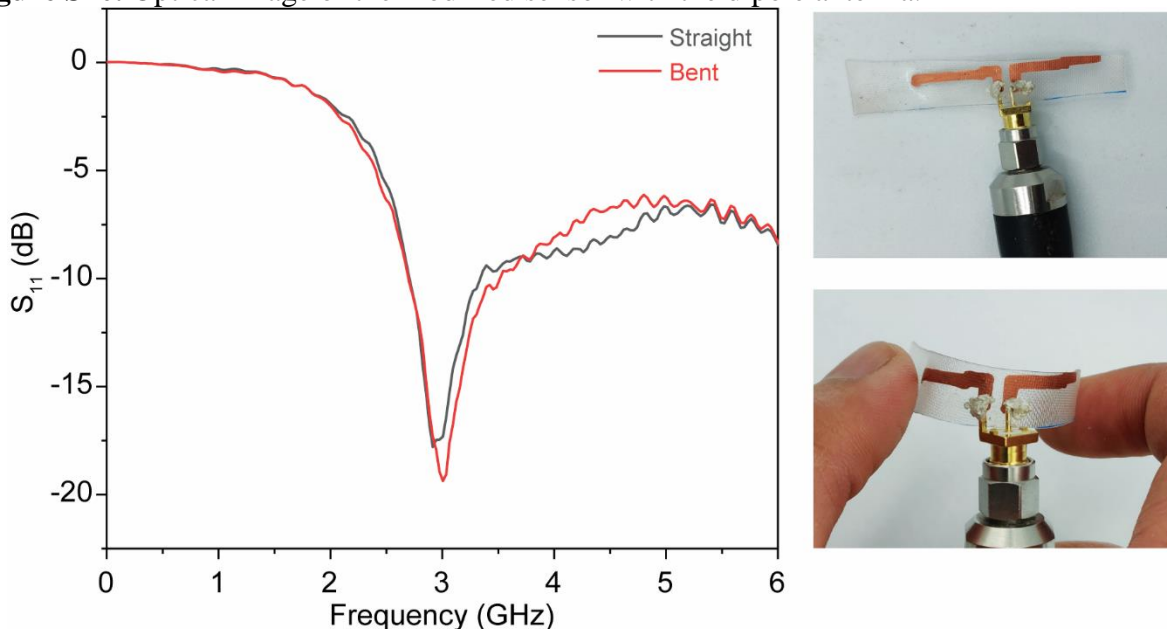

**Figure S11.** Plot depicting negligible change in the reflection coefficient ( $S_{11}$ ) when the antenna is in a bent state from its initial straight position.

**Table S1.** Comparison table for radar chart in Figure 1.

| Material                             | Cost                                                             | Conductivity              | Response time | Sensitivity            | Scalability |
|--------------------------------------|------------------------------------------------------------------|---------------------------|---------------|------------------------|-------------|
| Copper NPL (This work)               | Low                                                              | 2.3 MS/m                  | 130ms         | 0.42 kPa <sup>-1</sup> | High        |
| Graphene/C foam hybrid <sup>1</sup>  | High (freeze drying + thermal annealing)                         | 0.2 S/cm                  | <10s          | 0.19 kPa <sup>-1</sup> | Low         |
| Graphene Porous network <sup>2</sup> | High                                                             | 2.0 × 10 <sup>2</sup> S/m | 100ms         | 0.09 kPa <sup>-1</sup> | Low         |
| Carbon cotton <sup>3</sup>           | Medium (pyrolyzed at 900°C for 1 h in N <sub>2</sub> atmosphere) | 11 S/m                    | 100ms         | 0.33 kPa <sup>-1</sup> | Medium      |

|                                                                        |                                          |                 |      |                        |        |
|------------------------------------------------------------------------|------------------------------------------|-----------------|------|------------------------|--------|
| Au/PET electrode <sup>4</sup>                                          | High (Precious Metal)                    | 1.7 MS/m        | 20ms | 0.42 kPa <sup>-1</sup> | Medium |
| Copper Nanowire-Based Aerogel <sup>5</sup>                             | Moderately High (freeze drying involved) | 1.6 – 12.8 S/cm | 9ms  | 0.7 kPa <sup>-1</sup>  | Medium |
| Silver Nanowire/Ethylene-co-vinyl Acetate Composite Films <sup>6</sup> | Medium                                   | 25000 S/m       | 16ms | 67.3 kPa <sup>-1</sup> | High   |

## References

1. J. Kuang, Z. Dai, L. Liu, Z. Yang, M. Jin and Z. Zhang, *Nanoscale*, 2015, **7**, 9252-9260.
2. Y. Pang, H. Tian, L. Tao, Y. Li, X. Wang, N. Deng, Y. Yang and T.-L. Ren, *ACS applied materials & interfaces*, 2016, **8**, 26458-26462.
3. Y. Li, Y. A. Samad and K. Liao, *Journal of Materials Chemistry A*, 2015, **3**, 2181-2187.
4. Y. Luo, J. Shao, S. Chen, X. Chen, H. Tian, X. Li, L. Wang, D. Wang and B. Lu, *ACS applied materials & interfaces*, 2019, **11**, 17796-17803.
5. X. Xu, R. Wang, P. Nie, Y. Cheng, X. Lu, L. Shi and J. Sun, *ACS applied materials & interfaces*, 2017, **9**, 14273-14280.
6. W. He, G. Li, S. Zhang, Y. Wei, J. Wang, Q. Li and X. Zhang, *Acs Nano*, 2015, **9**, 4244-4251.
